# Supplementary material
Source: PubMed Central journal article supplement (PMC3486394)
Supplement: JB.00810-12_zjb999092088so1.pdf [file JB.00810-12_zjb999092088so1.pdf]

## ***Nitrosomonas europaea* glycogen synthase: Molecular cloning, expression and purification**

The gene *glgA* (NE2264), coding for glycogen synthase (GSase; ADP-glucose:1,4- $\alpha$ -D-glucan 4- $\alpha$ -D-glucosyl-transferase, EC 2.4.2.21) in *Nitrosomonas europaea* was amplified by PCR. Primers specifically designed from the gene sequence were: *NeuGSFow*, GCTAGCATGTCTTCATCTCCTTCCCGC and *NeuGSRev*, TTACTCGAGTCGCTGCATCAACAGCG. The PCR reaction contained: 25 ng of *N. europaea* ATCC 19817 genomic DNA; 2 mM MgCl<sub>2</sub>; 2  $\mu$ M of each primer; 200  $\mu$ M dNTPs and 0,1 U/ $\mu$ l *Taq* DNA polymerase (Fermentas). After an initial denaturalization of 30 s at 95 °C, we performed 30 cycles of 95 °C for 60 s, 60 °C for 40 s, and 72 °C for 1:30 min, followed by a 10 min extension at 72 °C. The PCR product was purified in an agarose gel electrophoresis and cloned into pGEM-Teasy vector (Promega). Then, it was subcloned in the pET24a vector (Novagen), using the *NheI* and *XhoI* restriction enzymes. This construction was used to transform *E. coli* BL21 (DE3) + [pG-KJE8] strain. The [pG-KJE8] vector corresponds to the Takara chaperones plasmids series (4, 5).

Transformed cells were grown overnight at 37 °C with shaking at 200 rpm in LB supplemented with 20  $\mu$ g/ml chloramphenicol and 50  $\mu$ g/ml kanamycin. The overnight culture was diluted 1/100 in fresh media supplemented with 20  $\mu$ g/ml chloramphenicol, 50  $\mu$ g/m kanamycin and 2 ng/ml tetracycline (for the induction of GroEL-GroES chaperones expression) and grown under identical conditions to exponential phase (OD<sub>600</sub> of 0.6) at 37 °C. The expression of recombinant GSase was induced by adding 0.2 mM IPTG followed by growing at 23 °C during 18 h. After harvesting by centrifugation, the cell paste was resuspended in binding buffer H [25 mM TrisHCl pH 8,0; 300 mM

NaCl; 10 mM imidazol] and disrupted by sonication. The lysate was centrifuged (36,000 g, 15 min) to remove cell debris. The resultant crude extract was loaded onto a Ni<sup>2+</sup>-NTA resin column that had been equilibrated with binding buffer H. The column was washed with two column volume each of buffer H plus 20 mM and then 40 mM imidazole. Finally, using buffer H plus 300 mM imidazole, the recombinant GSase was eluted with purity higher than 90%, as analyzed in SDS-PAGE. After adding glycerol 10% (v/v) the purified enzyme was stored at -80 °C, under which conditions it remained fully active for at least 3 months.

### **Glycogen synthase assay**

Activity of GSase was assayed with the method described by Wayllace (7). The standard assay medium contained (unless otherwise indicated) 100 mM MOPS pH 8.0; 2 mg/ml rabbit liver glycogen; 2 mM ADP-Glc; 1 mM PEP; 0.3 mM NADH; 10 mM MgCl<sub>2</sub>; 0.2 mg/ml BSA; 0.02 U/μl muscle rabbit pyruvate kinase and lactate deshydrogenase from *Lactobacillus* in a final volume of 50 μl. Enzyme activity was calculated following NADH consumption at 340 nm, using a Multiskan Ascent (Thermo). One unit (U) of enzymatic activity is defined as the amount of enzyme catalyzing the formation of 1 μmol ADP/min under the above specified conditions.

### **Phylogenetic analysis of ADP-Glc PPases and glycogen synthases from bacteria.**

Sequences coding for bacterial ADP-Glc PPases and glycogen synthases were downloaded from the NCBI database (<http://www.ncbi.nlm.nih.gov/>). They were filtered to remove duplicates and near duplicates (i.e. mutants and strains from same species). After a preliminary alignment, constructed using the ClustalW multiple sequence alignment server (<http://www.genome.jp/tools/clustalw/>) (3), sequences with a wrong annotation or truncated were also eliminated manually. Sequences that had lower than 30% identity to any other and did not have all the characterized critical motifs and catalytic residues were discarded. After this, sequences were chosen to represent most of the taxonomic groups from bacteria. We ensure we had a substantial representation from proteobacteria, which is the group *Nitrosomonas europaea* belong to. Sequences were classified into different groups using taxonomic data provided by the NCBI as depicted in Table S3 and Table S4. Once we settle on the sequences to use, they were aligned using the program T-Coffee (6). A manual inspection was performed to guarantee that all known conserved regions (catalytic residues etc.) were properly aligned. Trees were constructed by maximum likelihood with the program PhyML (2) incorporated into Seaview (1). Confidence coefficients for the tree branches were obtained and plot. Finally, the tree was prepared with the FigTree 1.3 program (<http://tree.bio.ed.ac.uk/>).

## References

1. **Gouy M, Guindon S, Gascuel O.** 2010. SeaView version 4: A multiplatform graphical user interface for sequence alignment and phylogenetic tree building. *Mol Biol Evol.* **27**:221-224.
2. **Guindon S, Gascuel O.** 2003. A simple, fast, and accurate algorithm to estimate large phylogenies by maximum likelihood. *Syst Biol.* **52**:696-704.
3. **Jeanmougin F, Thompson JD, Gouy M, Higgins DG, Gibson TJ.** 1998. Multiple sequence alignment with Clustal X. *Trends Biochem Sci.* **23**:403-405.
4. **Nishihara K, Kanemori M, Kitagawa M, Yanagi H, Yura T.** 1998. Chaperone coexpression plasmids: differential and synergistic roles of DnaK-DnaJ-GrpE and GroEL-GroES in assisting folding of an allergen of Japanese cedar pollen, Cryj2, in *Escherichia coli*. *Appl Environ Microbiol.* **64**:1694-1699.
5. **Nishihara K, Kanemori M, Yanagi H, Yura T.** 2000. Overexpression of trigger factor prevents aggregation of recombinant proteins in *Escherichia coli*. *Appl Environ Microbiol.* **66**:884-889.
6. **Notredame C, Higgins DG, Heringa J.** 2000. T-Coffee: A novel method for fast and accurate multiple sequence alignment. *J Mol Biol.* **302**:205-217.
7. **Wayllace NZ, Valdez HA, Meras A, Ugalde RA, Busi MV, Gomez-Casati DF.** 2011. An enzyme-coupled continuous spectrophotometric assay for glycogen synthases. *Mol Biol Rep.* **39**:585-591.

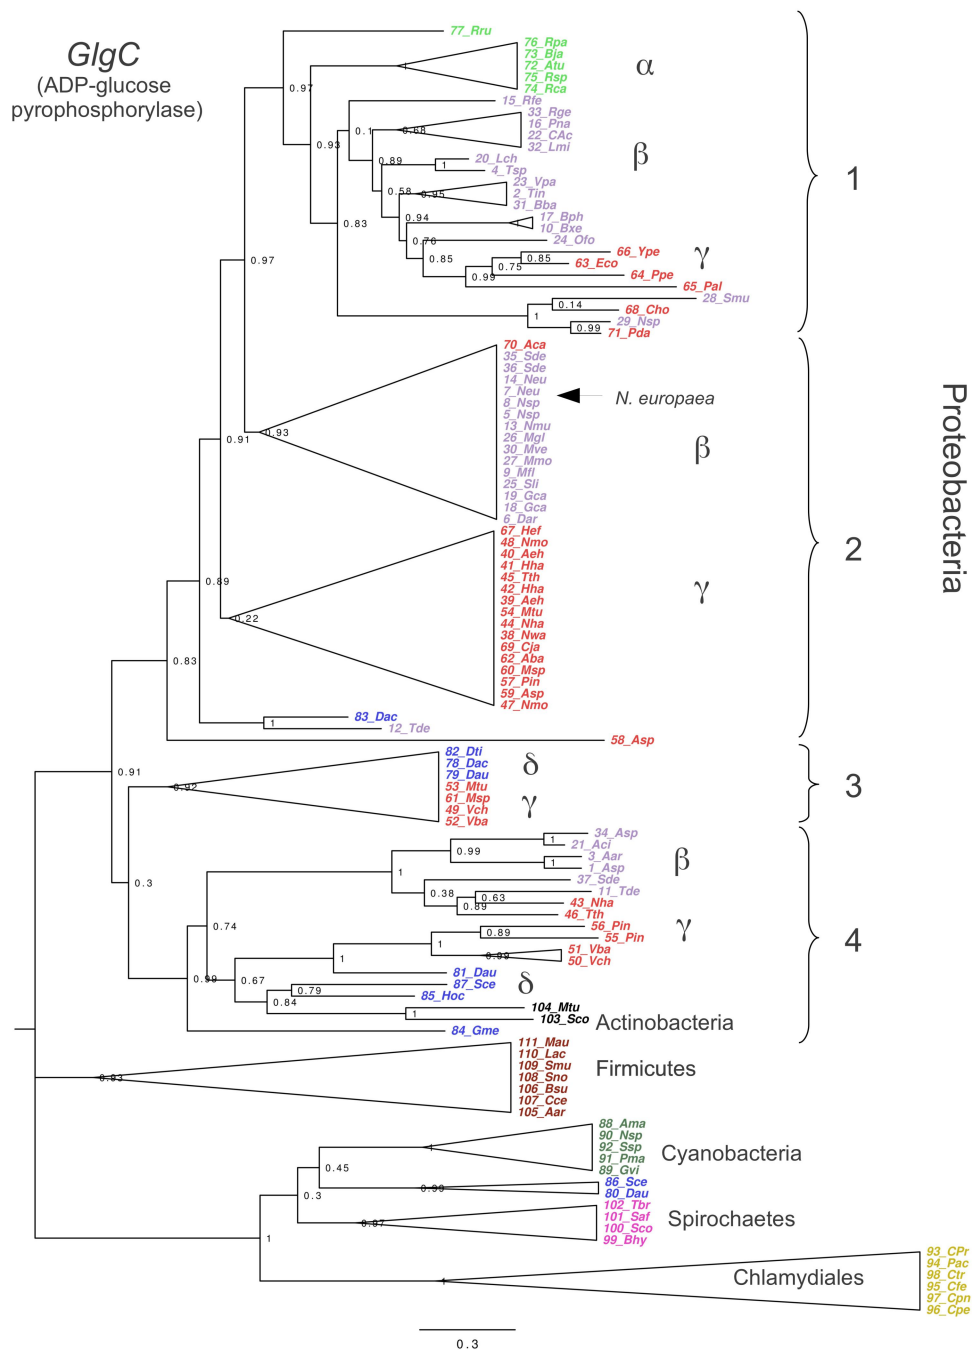

**Fig. S1. Phylogenetic tree of ADP-Glc PPases from bacteria.** Sequences of the *glgC* gene products were collected and the tree was built as described above. In the tree, it is indicated the confidence coefficients and the taxonomy data. Sequences are depicted with codes indexed in Table S3. Different colors represent different taxonomy. Sequences from proteobacteria ( $\alpha$ ,  $\beta$ ,  $\gamma$ , and  $\delta$ ) are indicated. Numbers indicate a particular cluster (1 to 4).

**Table S1. Number of *glgC* gene products located in a given cluster in the phylogenetic tree for bacteria with gene duplications.**

| Species <sup>a</sup>                          | Taxonomy         | Cluster <sup>b</sup> |   |   |       |
|-----------------------------------------------|------------------|----------------------|---|---|-------|
|                                               |                  | 2                    | 3 | 4 | Cyano |
| <i>Thiobacillus denitrificans</i> ATCC 25259  | β-proteobacteria | 1                    |   | 1 |       |
| <i>Sulfuricella denitrificans</i> skB26       | β-proteobacteria | 2                    |   | 1 |       |
| <i>Alkalilimnicola ehrlichii</i> MLHE-1       | γ-proteobacteria | 2                    |   |   |       |
| <i>Halorhodospira halophila</i> SL1           | γ-proteobacteria | 2                    |   |   |       |
| <i>Nitrosococcus halophilus</i> Nc4           | γ-proteobacteria | 1                    |   | 1 |       |
| <i>Thioalkalivibrio thiocyanoxidans</i> ARh 4 | γ-proteobacteria | 1                    |   | 1 |       |
| <i>Vibrio cholerae</i> 12129(1)               | γ-proteobacteria |                      | 1 | 1 |       |
| <i>Vibrionales bacterium</i> SWAT-3           | γ-proteobacteria |                      | 1 | 1 |       |
| <i>Methylobacter tundripaludum</i> SV96       | γ-proteobacteria | 1                    | 1 |   |       |
| <i>Psychromonas ingrahamii</i> 37             | γ-proteobacteria | 1                    |   | 1 |       |
| <i>Alteromonas</i> sp. SN2                    | γ-proteobacteria | 2                    |   |   |       |
| <i>Moritella</i> sp. PE36                     | γ-proteobacteria | 1                    | 1 |   |       |
| <i>Desulfobacterium autotrophicum</i> HRM2    | δ-proteobacteria |                      | 1 | 1 | 1     |
| <i>Sorangium cellulosum</i> 'So ce 56'        | δ-proteobacteria |                      |   | 1 | 1     |

<sup>a</sup> These are the bacteria that have more than one homologous *glgC* gene in their genome.

<sup>b</sup> Clusters are the one depicted in the phylogenetic analysis, 2, 3, 4, and Cyanobacteria (Fig. S1). The number in the respective column is the amount of genes per cluster.

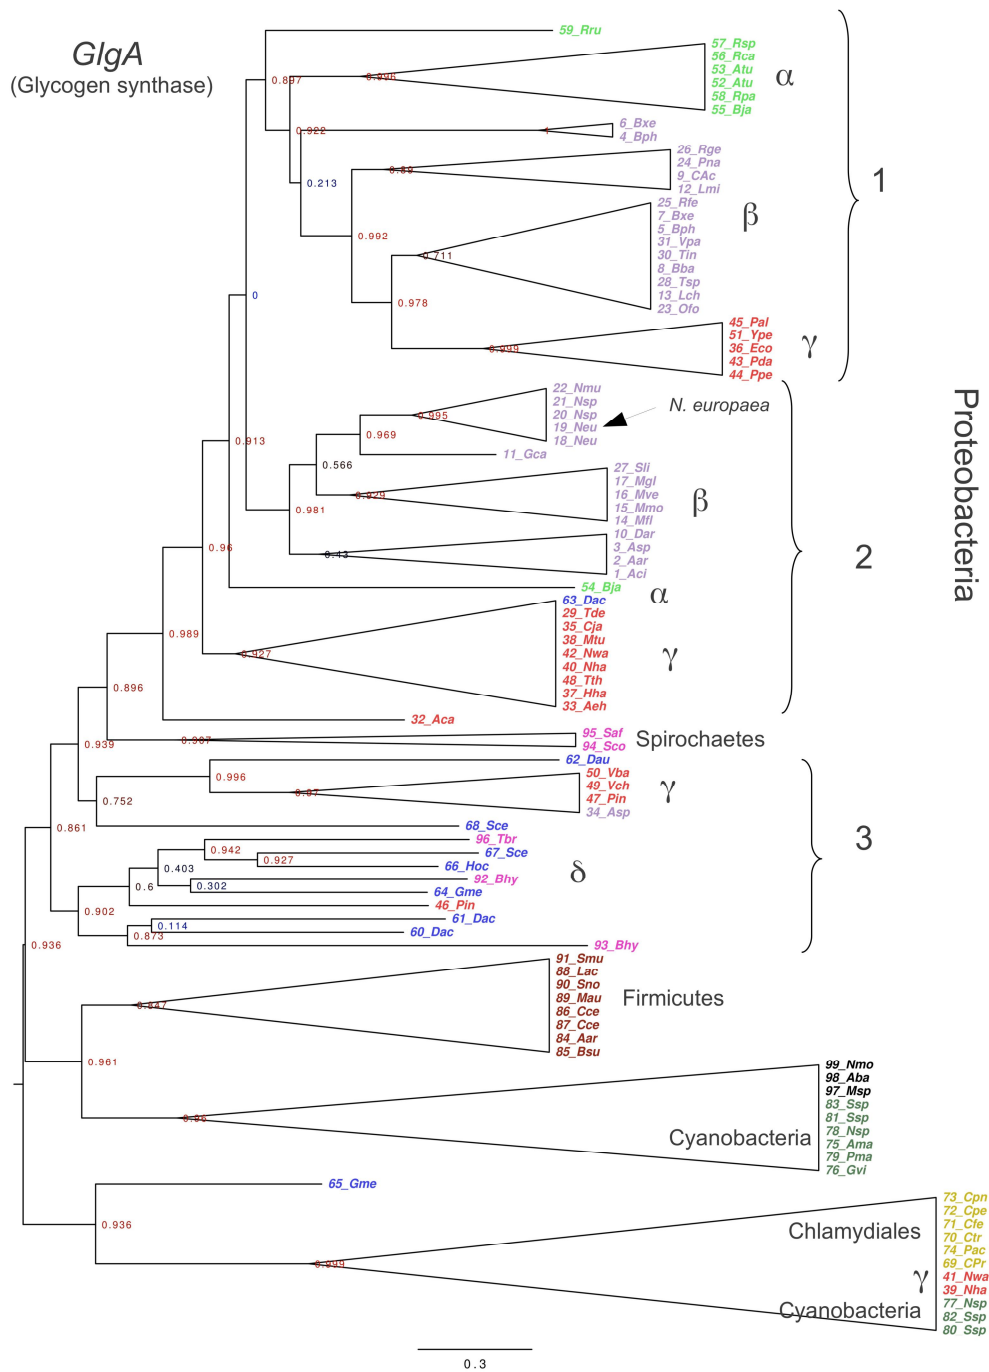

**Fig. S2. Phylogenetic tree of glycogen synthases from bacteria.** Sequences of the *glgA* gene products were collected and the tree was built as described. In the tree, it is indicated the confidence coefficients and the taxonomy data. Sequences are depicted with codes indexed in Table S4. Different colors represent different taxonomy. Sequences from proteobacteria ( $\alpha$ ,  $\beta$ ,  $\gamma$ , and  $\delta$ ) are indicated. Numbers indicate a particular cluster (1 to 3).

**Table S2. Number of *glgA* gene products located in a given cluster in the phylogenetic tree for bacteria with gene duplications.**

| <i>Species</i> <sup>a</sup>               | Taxonomy         | Cluster <sup>b</sup> |   |   |     |      |
|-------------------------------------------|------------------|----------------------|---|---|-----|------|
|                                           |                  | 1                    | 2 | 3 | Cya | Chla |
| <i>Burkholderia phymatum</i> STM815       | β-proteobacteria | 2                    |   |   |     |      |
| <i>Burkholderia xenovorans</i> LB400      | β-proteobacteria | 2                    |   |   |     |      |
| <i>Nitrosococcus halophilus</i> Nc4       | γ-proteobacteria |                      | 1 |   |     |      |
| <i>Nitrosococcus watsonii</i> C-113       | γ-proteobacteria |                      | 1 |   |     |      |
| <i>Psychromonas ingrahamii</i> 37         | γ-proteobacteria |                      |   | 2 |     |      |
| <i>Agrobacterium tumefaciens</i> str. C58 | α-proteobacteria | 2                    |   |   |     |      |
| <i>Bradyrhizobium japonicum</i> USDA 110  | α-proteobacteria | 1                    | 1 |   |     |      |
| <i>Desulfobacca acetoxidans</i> DSM 11109 | δ-proteobacteria |                      |   | 2 |     |      |
| <i>Geobacter metallireducens</i> GS-15    | δ-proteobacteria |                      |   | 1 |     |      |
| <i>Sorangium cellulosum</i> 'So ce 56'    | δ-proteobacteria |                      |   | 2 |     |      |
| <i>Nostoc</i> sp. PCC 7120                | Cyanobacteria    |                      |   |   | 1   | 1    |
| <i>Synechocystis</i> sp. PCC 6803         | Cyanobacteria    |                      |   |   | 2   | 2    |
| <i>Brachyspira hyodysenteriae</i> WAI     | Spirochaetes     |                      |   | 2 |     |      |

<sup>a</sup> These are the bacteria that have more than one homologous *glgA* gene in their genome.

<sup>b</sup> Clusters are the one depicted in the phylogenetic analysis, 1, 2, 3, Cyanobacteria, and Chlamydiales (Fig. S2). The number in the respective column is the amount of genes per cluster.



**Table S3. ADP-Glc PPase sequences (GlgC) used for phylogenetic analysis.**

| GI Accession | Species                                                         | Code   | Taxon                |
|--------------|-----------------------------------------------------------------|--------|----------------------|
| 119898088    | <i>Azoarcus sp. BH72</i>                                        | 1_Asp  | Beta-proteobacteria  |
| 296135572    | <i>Thiomonas intermedia K12</i>                                 | 2_Tin  | Beta-proteobacteria  |
| 56479382     | <i>Aromatoleum aromaticum EbN1</i>                              | 3_Aar  | Beta-proteobacteria  |
| 217970454    | <i>Thauera sp. MZ1T</i>                                         | 4_Tsp  | Beta-proteobacteria  |
| 325983317    | <i>Nitrosomonas sp. AL212</i>                                   | 5_Nsp  | Beta-proteobacteria  |
| 71906225     | <i>Dechloromonas aromatica RCB</i>                              | 6_Dar  | Beta-proteobacteria  |
| 30249970     | <i>Nitrosomonas europaea ATCC 19718</i>                         | 7_Neu  | Beta-proteobacteria  |
| 339484394    | <i>Nitrosomonas sp. Is79A3</i>                                  | 8_Nsp  | Beta-proteobacteria  |
| 91775721     | <i>Methylobacillus flagellatus KT</i>                           | 9_Mfl  | Beta-proteobacteria  |
| 91782889     | <i>Burkholderia xenovorans LB400</i>                            | 10_Bxe | Beta-proteobacteria  |
| 74317193     | <i>Thiobacillus denitrificans ATCC 25259</i>                    | 11_Tde | Beta-proteobacteria  |
| 74318079     | <i>Thiobacillus denitrificans ATCC 25259</i>                    | 12_Tde | Beta-proteobacteria  |
| 82701851     | <i>Nitrospira multififormis ATCC 25196</i>                      | 13_Nmu | Beta-proteobacteria  |
| 114331286    | <i>Nitrosomonas eutropha C91</i>                                | 14_Neu | Beta-proteobacteria  |
| 89899325     | <i>Rhodoferax ferrireducens T118</i>                            | 15_Rfe | Beta-proteobacteria  |
| 121604015    | <i>Polaromonas naphthalenivorans CJ2</i>                        | 16_Pna | Beta-proteobacteria  |
| 186476555    | <i>Burkholderia phymatum STM815</i>                             | 17_Bph | Beta-proteobacteria  |
| 302877866    | <i>Gallionella capsiferriformans ES-2</i>                       | 18_Gca | Beta-proteobacteria  |
| 302878592    | <i>Gallionella capsiferriformans ES-2</i>                       | 19_Gca | Beta-proteobacteria  |
| 171058572    | <i>Leptothrix cholodnii SP-6</i>                                | 20_Lch | Beta-proteobacteria  |
| 120611645    | <i>Acidovorax citrulli AAC00-1</i>                              | 21_Aci | Beta-proteobacteria  |
| 257093709    | <i>Candidatus Accumulibacter phosphatis clade IIA str. UW-1</i> | 22_CAc | Beta-proteobacteria  |
| 239813432    | <i>Variovorax paradoxus S110</i>                                | 23_Vpa | Beta-proteobacteria  |
| 237748940    | <i>Oxalobacter formigenes OXCC13</i>                            | 24_Ofo | Beta-proteobacteria  |
| 291614267    | <i>Sideroxydans lithotrophicus ES-1</i>                         | 25_Sli | Beta-proteobacteria  |
| 253998981    | <i>Methylovorus glucosetrophus SIP3-4</i>                       | 26_Mgl | Beta-proteobacteria  |
| 253996202    | <i>Methylothermobacter mobilis JLW8</i>                         | 27_Mmo | Beta-proteobacteria  |
| 294788710    | <i>Simonsiella muelleri ATCC 29453</i>                          | 28_Smu | Beta-proteobacteria  |
| 298369492    | <i>Neisseria sp. oral taxon 014 str. F0314</i>                  | 29_Nsp | Beta-proteobacteria  |
| 297538687    | <i>Methylothermobacter versatilis 301</i>                       | 30_Mve | Beta-proteobacteria  |
| 375105315    | <i>Burkholderiales bacterium JOSHI_001</i>                      | 31_Bba | Beta-proteobacteria  |
| 319944837    | <i>Lautropia mirabilis ATCC 51599</i>                           | 32_Lmi | Beta-proteobacteria  |
| 383758760    | <i>Rubrivivax gelatinosus IL144</i>                             | 33_Rge | Beta-proteobacteria  |
| 395008322    | <i>Acidovorax sp. CF316</i>                                     | 34_Asp | Beta-proteobacteria  |
| 394987804    | <i>Sulfuricella denitrificans skB26</i>                         | 35_Sde | Beta-proteobacteria  |
| 394987872    | <i>Sulfuricella denitrificans skB26</i>                         | 36_Sde | Beta-proteobacteria  |
| 394988308    | <i>Sulfuricella denitrificans skB26</i>                         | 37_Sde | Beta-proteobacteria  |
| 300113472    | <i>Nitrosococcus watsonii C-113</i>                             | 38_Nwa | Gamma-proteobacteria |
| 114320119    | <i>Alkalilimnicola ehrlichii MLHE-1</i>                         | 39_Aeh | Gamma-proteobacteria |
| 114319816    | <i>Alkalilimnicola ehrlichii MLHE-1</i>                         | 40_Aeh | Gamma-proteobacteria |
| 121998643    | <i>Halorhodospira halophila SL1</i>                             | 41_Hha | Gamma-proteobacteria |
| 121997897    | <i>Halorhodospira halophila SL1</i>                             | 42_Hha | Gamma-proteobacteria |
| 292491590    | <i>Nitrosococcus halophilus Nc4</i>                             | 43_Nha | Gamma-proteobacteria |
| 292491218    | <i>Nitrosococcus halophilus Nc4</i>                             | 44_Nha | Gamma-proteobacteria |
| 350561821    | <i>Thioalkalivibrio thiocyanoxidans ARh 4</i>                   | 45_Tth | Gamma-proteobacteria |
| 350561659    | <i>Thioalkalivibrio thiocyanoxidans ARh 4</i>                   | 46_Tth | Gamma-proteobacteria |
| 88813574     | <i>Nitrococcus mobilis Nb-231</i>                               | 47_Nmo | Gamma-proteobacteria |

|           |                                                    |        |                      |
|-----------|----------------------------------------------------|--------|----------------------|
| 88811612  | <i>Nitrococcus mobilis</i> Nb-231                  | 48_Nmo | Gamma-proteobacteria |
| 229528475 | <i>Vibrio cholerae</i> 12129(1)                    | 49_Vch | Gamma-proteobacteria |
| 229529245 | <i>Vibrio cholerae</i> 12129(1)                    | 50_Vch | Gamma-proteobacteria |
| 148977548 | <i>Vibrionales bacterium</i> SWAT-3                | 51_Vba | Gamma-proteobacteria |
| 148975147 | <i>Vibrionales bacterium</i> SWAT-3                | 52_Vba | Gamma-proteobacteria |
| 344943819 | <i>Methylobacter tundripaludum</i> SV96            | 53_Mtu | Gamma-proteobacteria |
| 344940183 | <i>Methylobacter tundripaludum</i> SV96            | 54_Mtu | Gamma-proteobacteria |
| 119946654 | <i>Psychromonas ingrahamii</i> 37                  | 55_Pin | Gamma-proteobacteria |
| 119946655 | <i>Psychromonas ingrahamii</i> 37                  | 56_Pin | Gamma-proteobacteria |
| 119945042 | <i>Psychromonas ingrahamii</i> 37                  | 57_Pin | Gamma-proteobacteria |
| 333892129 | <i>Alteromonas</i> sp. SN2                         | 58_Asp | Gamma-proteobacteria |
| 333893518 | <i>Alteromonas</i> sp. SN2                         | 59_Asp | Gamma-proteobacteria |
| 149910892 | <i>Moritella</i> sp. PE36                          | 60_Msp | Gamma-proteobacteria |
| 149911154 | <i>Moritella</i> sp. PE36                          | 61_Msp | Gamma-proteobacteria |
| 119468777 | <i>Alteromonadales bacterium</i> TW-7              | 62_Aba | Gamma-proteobacteria |
| 16131304  | <i>Escherichia coli</i> str. K-12 substr. MG1655   | 63_Eco | Gamma-proteobacteria |
| 226330079 | <i>Proteus penneri</i> ATCC 35198                  | 64_Ppe | Gamma-proteobacteria |
| 212710453 | <i>Providencia alcalifaciens</i> DSM 30120         | 65_Pal | Gamma-proteobacteria |
| 384138208 | <i>Yersinia pestis</i> A1122                       | 66_Ype | Gamma-proteobacteria |
| 392953280 | <i>Hydrocarboniphaga effusa</i> API03              | 67_Hef | Gamma-proteobacteria |
| 258543877 | <i>Cardiobacterium hominis</i> ATCC 15826          | 68_Cho | Gamma-proteobacteria |
| 192360471 | <i>Cellvibrio japonicus</i> Ueda107                | 69_Cja | Gamma-proteobacteria |
| 255020713 | <i>Acidithiobacillus caldus</i> ATCC 51756         | 70_Aca | Gamma-proteobacteria |
| 260914094 | <i>Pasteurella dagmatis</i> ATCC 43325             | 71_Pda | Gamma-proteobacteria |
| 15890896  | <i>Agrobacterium tumefaciens</i> str. C58          | 72_Atu | Alpha-proteobacteria |
| 27381569  | <i>Bradyrhizobium japonicum</i> USDA 110           | 73_Bja | Alpha-proteobacteria |
| 294677377 | <i>Rhodobacter capsulatus</i> SB 1003              | 74_Rca | Alpha-proteobacteria |
| 146277181 | <i>Rhodobacter sphaeroides</i> ATCC 17025          | 75_Rsp | Alpha-proteobacteria |
| 115522826 | <i>Rhodopseudomonas palustris</i> BisA53           | 76_Rpa | Alpha-proteobacteria |
| 83593581  | <i>Rhodospirillum rubrum</i> ATCC 11170            | 77_Rru | Alpha-proteobacteria |
| 328953288 | <i>Desulfobacca acetoxidans</i> DSM 11109          | 78_Dac | Delta-proteobacteria |
| 224367273 | <i>Desulfobacterium autotrophicum</i> HRM2         | 79_Dau | Delta-proteobacteria |
| 224367976 | <i>Desulfobacterium autotrophicum</i> HRM2         | 80_Dau | Delta-proteobacteria |
| 224369989 | <i>Desulfobacterium autotrophicum</i> HRM2         | 81_Dau | Delta-proteobacteria |
| 392410016 | <i>Desulfomonile tiedjei</i> DSM 6799              | 82_Dti | Delta-proteobacteria |
| 95930373  | <i>Desulfuromonas acetoxidans</i> DSM 684          | 83_Dac | Delta-proteobacteria |
| 78223964  | <i>Geobacter metallireducens</i> GS-15             | 84_Gme | Delta-proteobacteria |
| 262198960 | <i>Haliangium ochraceum</i> DSM 14365              | 85_Hoc | Delta-proteobacteria |
| 162453622 | <i>Sorangium cellulosum</i> 'So ce 56'             | 86_Sce | Delta-proteobacteria |
| 162455376 | <i>Sorangium cellulosum</i> 'So ce 56'             | 87_Sce | Delta-proteobacteria |
| 209527099 | <i>Arthrospira maxima</i> CS-328                   | 88_Ama | Cyanobacteria        |
| 37523829  | <i>Gloeobacter violaceus</i> PCC 7421              | 89_Gvi | Cyanobacteria        |
| 17232137  | <i>Nostoc</i> sp. PCC 7120                         | 90_Nsp | Cyanobacteria        |
| 123968364 | <i>Prochlorococcus marinus</i> str. AS9601         | 91_Pma | Cyanobacteria        |
| 16332282  | <i>Synechocystis</i> sp. PCC 6803                  | 92_Ssp | Cyanobacteria        |
| 46445743  | <i>Candidatus Protochlamydia amoebophila</i> UWE25 | 93_CPr | Chlamydiales         |
| 338174863 | <i>Parachlamydia acanthamoebae</i> UV-7            | 94_Pac | Chlamydiales         |
| 89898680  | <i>Chlamydophila felis</i> Fe/C-56                 | 95_Cfe | Chlamydiales         |
| 330444153 | <i>Chlamydophila pecorum</i> E58                   | 96_Cpe | Chlamydiales         |
| 16752433  | <i>Chlamydophila pneumoniae</i> AR39               | 97_Cpn | Chlamydiales         |

|           |                                                             |         |                |
|-----------|-------------------------------------------------------------|---------|----------------|
| 301335976 | <i>Chlamydia trachomatis</i> L2tet1                         | 98_Ctr  | Chlamydiales   |
| 225619033 | <i>Brachyspira hyodysenteriae</i> WA1                       | 99_Bhy  | Spirochaetes   |
| 330836901 | <i>Sphaerochaeta coccoides</i> DSM 17374                    | 100_Sco | Spirochaetes   |
| 383790014 | <i>Spirochaeta africana</i> DSM 8902                        | 101_Saf | Spirochaetes   |
| 332298391 | <i>Treponema brennaborensis</i> DSM 12168                   | 102_Tbr | Spirochaetes   |
| 161353683 | <i>Streptomyces coelicolor</i> A3(2)                        | 103_Sco | Actinobacteria |
| 289757310 | <i>Mycobacterium tuberculosis</i> T85                       | 104_Mtu | Actinobacteria |
| 302391855 | <i>Acetohalobium arabaticum</i> DSM 5501                    | 105_Aar | Firmicutes     |
| 296330046 | <i>Bacillus subtilis</i> subsp. <i>spizizenii</i> ATCC 6633 | 106_Bsu | Firmicutes     |
| 238054288 | <i>Clostridium cellulolyticum</i> H10                       | 107_Cce | Firmicutes     |
| 292670340 | <i>Selenomonas noxia</i> ATCC 43541                         | 108_Sno | Firmicutes     |
| 397650148 | <i>Streptococcus mutans</i> GS-5                            | 109_Smu | Firmicutes     |
| 325956380 | <i>Lactobacillus acidophilus</i> 30SC                       | 110_Lac | Firmicutes     |
| 332982541 | <i>Mahella australiensis</i> 50-1 BON                       | 111_Mau | Firmicutes     |

---

**Table S4. Glycogen synthase sequences (GlgA) used for phylogenetic analysis.**

| GI Accession | Species                                                         | Code   | Taxon                |
|--------------|-----------------------------------------------------------------|--------|----------------------|
| 120611649    | <i>Acidovorax citrulli</i> AAC00-1                              | 1_Aci  | Beta-proteobacteria  |
| 56479379     | <i>Aromatoleum aromaticum</i> EbN1                              | 2_Aar  | Beta-proteobacteria  |
| 119898092    | <i>Azoarcus</i> sp. BH72                                        | 3_Asp  | Beta-proteobacteria  |
| 186474118    | <i>Burkholderia phymatum</i> STM815                             | 4_Bph  | Beta-proteobacteria  |
| 186476556    | <i>Burkholderia phymatum</i> STM815                             | 5_Bph  | Beta-proteobacteria  |
| 91778822     | <i>Burkholderia xenovorans</i> LB400                            | 6_Bxe  | Beta-proteobacteria  |
| 91782888     | <i>Burkholderia xenovorans</i> LB400                            | 7_Bxe  | Beta-proteobacteria  |
| 375105316    | <i>Burkholderiales bacterium</i> JOSHI_001                      | 8_Bba  | Beta-proteobacteria  |
| 257093710    | <i>Candidatus Accumulibacter phosphatis</i> clade IIA str. UW-1 | 9_CAc  | Beta-proteobacteria  |
| 71906220     | <i>Dechloromonas aromatica</i> RCB                              | 10_Dar | Beta-proteobacteria  |
| 302878554    | <i>Gallionella capsiferriformans</i> ES-2                       | 11_Gca | Beta-proteobacteria  |
| 319944836    | <i>Lautropia mirabilis</i> ATCC 51599                           | 12_Lmi | Beta-proteobacteria  |
| 171058573    | <i>Leptothrix cholodnii</i> SP-6                                | 13_Lch | Beta-proteobacteria  |
| 91775825     | <i>Methylobacillus flagellatus</i> KT                           | 14_Mfl | Beta-proteobacteria  |
| 253996721    | <i>Methylothermobacter mobilis</i> JLW8                         | 15_Mmo | Beta-proteobacteria  |
| 297538699    | <i>Methylothermobacter versatilis</i> 301                       | 16_Mve | Beta-proteobacteria  |
| 253999146    | <i>Methylovorus glucosetrophus</i> SIP3-4                       | 17_Mgl | Beta-proteobacteria  |
| 30250196     | <i>Nitrosomonas europaea</i> ATCC 19718                         | 18_Neu | Beta-proteobacteria  |
| 114330623    | <i>Nitrosomonas eutropha</i> C91                                | 19_Neu | Beta-proteobacteria  |
| 325983313    | <i>Nitrosomonas</i> sp. AL212                                   | 20_Nsp | Beta-proteobacteria  |
| 339484398    | <i>Nitrosomonas</i> sp. Is79A3                                  | 21_Nsp | Beta-proteobacteria  |
| 82701849     | <i>Nitrospira multiformis</i> ATCC 25196                        | 22_Nmu | Beta-proteobacteria  |
| 237748939    | <i>Oxalobacter formigenes</i> OXCC13                            | 23_Ofo | Beta-proteobacteria  |
| 121604016    | <i>Polaromonas naphthalenivorans</i> CJ2                        | 24_Pna | Beta-proteobacteria  |
| 89899324     | <i>Rhodoferrax ferrireducens</i> T118                           | 25_Rfe | Beta-proteobacteria  |
| 383758759    | <i>Rubrivivax gelatinosus</i> IL144                             | 26_Rge | Beta-proteobacteria  |
| 291614268    | <i>Sideroxydans lithotrophicus</i> ES-1                         | 27_Sli | Beta-proteobacteria  |
| 217970453    | <i>Thauera</i> sp. MZIT                                         | 28_Tsp | Beta-proteobacteria  |
| 74318075     | <i>Thiobacillus denitrificans</i> ATCC 25259                    | 29_Tde | Beta-proteobacteria  |
| 296135571    | <i>Thiomonas intermedia</i> K12                                 | 30_Tin | Beta-proteobacteria  |
| 239813431    | <i>Variovorax paradoxus</i> S110                                | 31_Vpa | Beta-proteobacteria  |
| 255020599    | <i>Acidithiobacillus caldus</i> ATCC 51756                      | 32_Aca | Gamma-proteobacteria |
| 114320117    | <i>Alkalilimnicola ehrlichii</i> MLHE-1                         | 33_Aeh | Gamma-proteobacteria |
| 333894848    | <i>Alteromonas</i> sp. SN2                                      | 34_Asp | Gamma-proteobacteria |
| 192361131    | <i>Cellvibrio japonicus</i> Ueda107                             | 35_Cja | Gamma-proteobacteria |
| 16131303     | <i>Escherichia coli</i> str. K-12 substr. MG1655                | 36_Eco | Gamma-proteobacteria |
| 121997895    | <i>Halorhodospira halophila</i> SL1                             | 37_Hha | Gamma-proteobacteria |
| 344940181    | <i>Methylobacter tundripaludum</i> SV96                         | 38_Mtu | Gamma-proteobacteria |
| 292490263    | <i>Nitrosococcus halophilus</i> Nc4                             | 39_Nha | Gamma-proteobacteria |
| 292492253    | <i>Nitrosococcus halophilus</i> Nc4                             | 40_Nha | Gamma-proteobacteria |
| 300112811    | <i>Nitrosococcus watsonii</i> C-113                             | 41_Nwa | Gamma-proteobacteria |
| 300114912    | <i>Nitrosococcus watsonii</i> C-113                             | 42_Nwa | Gamma-proteobacteria |
| 260914093    | <i>Pasteurella dagmatis</i> ATCC 43325                          | 43_Pda | Gamma-proteobacteria |
| 226330078    | <i>Proteus penneri</i> ATCC 35198                               | 44_Ppe | Gamma-proteobacteria |
| 212710452    | <i>Providencia alcalifaciens</i> DSM 30120                      | 45_Pal | Gamma-proteobacteria |
| 119946006    | <i>Psychromonas ingrahamii</i> 37                               | 46_Pin | Gamma-proteobacteria |
| 119946656    | <i>Psychromonas ingrahamii</i> 37                               | 47_Pin | Gamma-proteobacteria |

|           |                                                      |        |                      |
|-----------|------------------------------------------------------|--------|----------------------|
| 350562434 | <i>Thioalkalivibrio thiocyanoxidans</i> ARh 4        | 48_Tth | Gamma-proteobacteria |
| 229529246 | <i>Vibrio cholerae</i> I2129(1)                      | 49_Vch | Gamma-proteobacteria |
| 148977547 | <i>Vibrionales bacterium</i> SWAT-3                  | 50_Vba | Gamma-proteobacteria |
| 384138209 | <i>Yersinia pestis</i> A1122                         | 51_Ype | Gamma-proteobacteria |
| 15890897  | <i>Agrobacterium tumefaciens</i> str. C58            | 52_Atu | Alpha-proteobacteria |
| 16119514  | <i>Agrobacterium tumefaciens</i> str. C58            | 53_Atu | Alpha-proteobacteria |
| 27377889  | <i>Bradyrhizobium japonicum</i> USDA 110             | 54_Bja | Alpha-proteobacteria |
| 27381570  | <i>Bradyrhizobium japonicum</i> USDA 110             | 55_Bja | Alpha-proteobacteria |
| 294677376 | <i>Rhodobacter capsulatus</i> SB 1003                | 56_Rca | Alpha-proteobacteria |
| 146277182 | <i>Rhodobacter sphaeroides</i> ATCC 17025            | 57_Rsp | Alpha-proteobacteria |
| 115522825 | <i>Rhodopseudomonas palustris</i> BisA53             | 58_Rpa | Alpha-proteobacteria |
| 83593580  | <i>Rhodospirillum rubrum</i> ATCC 11170              | 59_Rru | Alpha-proteobacteria |
| 328952818 | <i>Desulfobacca acetoxidans</i> DSM 11109            | 60_Dac | Delta-proteobacteria |
| 328954080 | <i>Desulfobacca acetoxidans</i> DSM 11109            | 61_Dac | Delta-proteobacteria |
| 224369988 | <i>Desulfobacterium autotrophicum</i> HRM2           | 62_Dau | Delta-proteobacteria |
| 95930377  | <i>Desulfuromonas acetoxidans</i> DSM 684            | 63_Dac | Delta-proteobacteria |
| 78221927  | <i>Geobacter metallireducens</i> GS-15               | 64_Gme | Delta-proteobacteria |
| 78224366  | <i>Geobacter metallireducens</i> GS-15               | 65_Gme | Delta-proteobacteria |
| 262199344 | <i>Haliangium ochraceum</i> DSM 14365                | 66_Hoc | Delta-proteobacteria |
| 162449333 | <i>Sorangium cellulosum</i> 'So ce 56'               | 67_Sce | Delta-proteobacteria |
| 162451433 | <i>Sorangium cellulosum</i> 'So ce 56'               | 68_Sce | Delta-proteobacteria |
| 46447230  | <i>Candidatus Protochlamydia amoebophila</i> UWE25   | 69_CPr | Chlamydiales         |
| 301335380 | <i>Chlamydia trachomatis</i> L2tet1                  | 70_Ctr | Chlamydiales         |
| 89898000  | <i>Chlamydophila felis</i> Fe/C-56                   | 71_Cfe | Chlamydiales         |
| 330443835 | <i>Chlamydophila pecorum</i> E58                     | 72_Cpe | Chlamydiales         |
| 16752082  | <i>Chlamydophila pneumoniae</i> AR39                 | 73_Cpn | Chlamydiales         |
| 338175893 | <i>Parachlamydia acanthamoebae</i> UV-7              | 74_Pac | Chlamydiales         |
| 209525093 | <i>Arthrospira maxima</i> CS-328                     | 75_Ama | Cyanobacteria        |
| 37520501  | <i>Gloeobacter violaceus</i> PCC 7421                | 76_Gvi | Cyanobacteria        |
| 17227527  | <i>Nostoc</i> sp. PCC 7120                           | 77_Nsp | Cyanobacteria        |
| 17229371  | <i>Nostoc</i> sp. PCC 7120                           | 78_Nsp | Cyanobacteria        |
| 123968200 | <i>Prochlorococcus marinus</i> str. AS9601           | 79_Pma | Cyanobacteria        |
| 16329217  | <i>Synechocystis</i> sp. PCC 6803                    | 80_Ssp | Cyanobacteria        |
| 16331219  | <i>Synechocystis</i> sp. PCC 6803                    | 81_Ssp | Cyanobacteria        |
| 384435276 | <i>Synechocystis</i> sp. PCC 6803                    | 82_Ssp | Cyanobacteria        |
| 384437283 | <i>Synechocystis</i> sp. PCC 6803                    | 83_Ssp | Cyanobacteria        |
| 302391856 | <i>Acetohalobium arabaticum</i> DSM 5501             | 84_Aar | Firmicutes           |
| 296330048 | <i>Bacillus subtilis</i> subsp. spizizenii ATCC 6633 | 85_Bsu | Firmicutes           |
| 220928759 | <i>Clostridium cellulolyticum</i> H10                | 86_Cce | Firmicutes           |
| 220929307 | <i>Clostridium cellulolyticum</i> H10                | 87_Cce | Firmicutes           |
| 325956382 | <i>Lactobacillus acidophilus</i> 30SC                | 88_Lac | Firmicutes           |
| 332982544 | <i>Mahella australiensis</i> 50-1 BON                | 89_Mau | Firmicutes           |
| 292670336 | <i>Selenomonas noxia</i> ATCC 43541                  | 90_Sno | Firmicutes           |
| 397650146 | <i>Streptococcus mutans</i> GS-5                     | 91_Smu | Firmicutes           |
| 225619029 | <i>Brachyspira hyodysenteriae</i> WAI                | 92_Bhy | Spirochaetes         |
| 225619571 | <i>Brachyspira hyodysenteriae</i> WAI                | 93_Bhy | Spirochaetes         |
| 330836900 | <i>Sphaerochaeta coccoides</i> DSM 17374             | 94_Sco | Spirochaetes         |
| 383790017 | <i>Spirochaeta africana</i> DSM 8902                 | 95_Saf | Spirochaetes         |
| 332298143 | <i>Treponema brennaborense</i> DSM 12168             | 96_Tbr | Spirochaetes         |
